# Supplementary material for: Second-Line Agents for Glycemic Control for Type 2 Diabetes: Are Newer Agents Better?
Source: Oxford University Press journal article supplement (doi:10.2337/dc13-1901), 2014-02-27
Supplement: dc131901supplementarydata.pdf [file dc131901supplementarydata.pdf]

## SUPPLEMENTARY DATA

### Appendix A. HbA<sub>1c</sub> Transition Probability Matrix Estimation

To estimate the 3-month HbA<sub>1c</sub> transition probabilities, we selected all pairs of HbA<sub>1c</sub> records from the 37,501 eligible patients such that the period between tests was between 2.5 and 3.5 months and the patient was not on insulin during that time period. This resulted in 30,249 pairs (multiple pairs permitted per patient). Using the observed HbA<sub>1c</sub> value,  $h_{i,t}$ , of patient  $i$  at time epoch  $t$ , the corresponding natural HbA<sub>1c</sub> value (without medication),  $h_{i,t}^n$ , was estimated as:

$$h_{i,t}^n = h_{i,t} \frac{1}{1 - \omega(m_{i,t})} \quad \forall i, t$$

Where  $m_{i,t}$  denotes patient  $i$ 's current treatment regimen and  $\omega(m_{i,t})$  is the estimated relative reduction in HbA<sub>1c</sub> when patient  $i$  is using treatment regimen  $m_{i,t}$  at time period  $t$  (Table 1). We discretized all natural HbA<sub>1c</sub> values into 10 HbA<sub>1c</sub> states as defined in Supplement Table s1 and Supplement Table s2. For any two HbA<sub>1c</sub> states,  $a$  and  $b$ , we denoted the total number of transitions from state  $a$  to state  $b$  as  $n_{ab}$ . The maximum likelihood estimate of the transition probability from state  $a$  to state  $b$  was estimated as:

$$q_a(b) = \frac{n_{ab}}{\sum_{b \in \mathcal{L}} n_{ab}}, \quad \forall a \in \mathcal{L}$$

where  $\mathcal{L}$  is the set of HbA<sub>1c</sub> states.

### Appendix B. Treatment Effect Estimation

Five classes of glucose-lowering medications were considered: metformin, sulfonylurea, DPP-IV inhibitor, GLP-1 agonist, and insulin. We assumed that once insulin was initiated, HbA<sub>1c</sub> would be maintained at a predefined level (it is set to be 7% in our numerical experiments). We also assumed that medications other than insulin had additive effect in reducing HbA<sub>1c</sub> (1); therefore, each medication effect was estimated independently.

For each medication other than insulin, we selected patients who had at least one HbA<sub>1c</sub> record within 3 months before and after its initiation, and who were treated with this medication for at least 3 consecutive months. For each selected patient, we calculated the pre-treatment HbA<sub>1c</sub> and the post-treatment HbA<sub>1c</sub> by taking the mean of his/her HbA<sub>1c</sub> records during the 3-month intervals before and after the date of initiation, respectively. The medication effect shown in Table 1 was then calculated as the overall mean relative change between the pre-treatment HbA<sub>1c</sub> and the post-treatment HbA<sub>1c</sub> of all the selected patients.

### Appendix C. Model Calibration and Validation

To calibrate and validate the model we used all HbA<sub>1c</sub> pairs of the eligible 37,501 patients such that the period between HbA<sub>1c</sub> tests was greater than or equal to 3.5 months (in order to have at least one 3-month transition) and the patient was not on insulin during that time period. This resulted in 97,667 pairs.

For each value of the linear trend factor,  $\beta$ , between 0 and 0.25, and for each initial test result in each pair, we simulated the second test result in the pair 100 times using the 3-month HbA<sub>1c</sub> transition probability matrix (Supplement Table s1 and Supplement Table s2) and the number of transitions,  $t_k$ , determined by the time interval between the two HbA<sub>1c</sub> tests of each pair  $k$ . Using the model-generated natural HbA<sub>1c</sub> state,  $\theta^k(t_k)$ , for each pair  $k$ , we calculated the model-generated HbA<sub>1c</sub> value,  $h_{k,t_k}(\theta^k(t_k))$  with medications initiated during the time interval as follows:

$$h_{k,t_k}(\theta^k(t_k)) = h^n(\theta^k(t_k)) + \beta \times t_k - \omega(m_{k,t_k}) \times h^n(\theta^k(t_k)),$$

where  $h^n(\theta^k(t_k))$  is the mean natural HbA<sub>1c</sub> value of being in the HbA<sub>1c</sub> state  $\theta^k(t_k) \in \mathcal{L}$  at diagnosis (Supplement Table s1 and Supplement Table s2) and  $\omega(m_{k,t_k})$  is the medication effect of using medications

## SUPPLEMENTARY DATA

Finally, we determined the model-generated HbA<sub>1c</sub> state for that pair based on the model-generated HbA<sub>1c</sub> value.

Given the 100 model-generated 97,667 HbA<sub>1c</sub> pairs, we calculated the mean of the sum of the squared errors (SSE) between the model-generated HbA<sub>1c</sub> state distribution and the observed HbA<sub>1c</sub> state distribution as:

$$F(\beta) = \frac{\sum_{i=1}^n (\pi - p^i(\beta))^T (\pi - p^i(\beta))}{n}$$

where  $\pi = (\pi(\ell_1), \pi(\ell_2), \dots, \pi(\ell_{10}))$  represents the observed HbA<sub>1c</sub> state probability distribution (based on the second HbA<sub>1c</sub> values in all pairs) and the vector  $p^i(\beta)$  represents the model-generated HbA<sub>1c</sub> state probability distribution for the  $i^{\text{th}}$  simulation with a fixed linear trend value  $\beta$ . The best linear trend was selected as the one that minimizes the mean of the SSE.

We found that the optimal trend factor was 0.1075 for men (mean SSE of 0.0022) and 0.105 for women (mean SSE of 0.0015) with the median difference between the observed HbA<sub>1c</sub> distribution and the simulated HbA<sub>1c</sub> distribution of 0.0096 (minimum: 0.0027, maximum 0.0271) for men and 0.0055 (minimum: 0.0000, maximum: 0.0197) for women.

# SUPPLEMENTARY DATA

**Supplementary Table 1.** Glycosylated hemoglobin (HbA<sub>1c</sub>) used in the Markov model for women. HbA<sub>1c</sub> range definition at diagnosis, the mean natural HbA<sub>1c</sub> values for each HbA<sub>1c</sub> state at diagnosis (prior to initiating medication), the initial HbA<sub>1c</sub> distributions at diagnosis, and 3-month HbA<sub>1c</sub> transition probability matrices for men and women.

|                                              |                                  | HbA <sub>1c</sub> State |         |         |         |         |         |         |         |          |        |
|----------------------------------------------|----------------------------------|-------------------------|---------|---------|---------|---------|---------|---------|---------|----------|--------|
|                                              |                                  | 1                       | 2       | 3       | 4       | 5       | 6       | 7       | 8       | 9        | 10     |
| <b>HbA<sub>1c</sub> Range</b>                |                                  | <6                      | [6,6.5) | [6.5,7) | [7,7.5) | [7.5,8) | [8,8.5) | [8.5,9) | [9,9.5) | [9.5,10) | ≥10    |
| <b>Mean HbA<sub>1c</sub> value (%)</b>       |                                  | 5.70                    | 6.25    | 6.74    | 7.24    | 7.73    | 8.23    | 8.73    | 9.22    | 9.72     | 11.73  |
| <b>Initial HbA<sub>1c</sub> Distribution</b> |                                  | 0.0771                  | 0.1543  | 0.2125  | 0.1800  | 0.1105  | 0.0848  | 0.0502  | 0.0350  | 0.0273   | 0.0683 |
| <b>Transition Probability Matrix</b>         | <b>HbA<sub>1c</sub> state 1</b>  | 0.6379                  | 0.3042  | 0.0481  | 0.0088  | 0.0010  | 0.0000  | 0.0000  | 0.0000  | 0.0000   | 0.0000 |
|                                              | <b>HbA<sub>1c</sub> state 2</b>  | 0.1717                  | 0.5086  | 0.2692  | 0.0412  | 0.0064  | 0.0020  | 0.0000  | 0.0000  | 0.0000   | 0.0010 |
|                                              | <b>HbA<sub>1c</sub> state 3</b>  | 0.0299                  | 0.1731  | 0.5214  | 0.2258  | 0.0374  | 0.0085  | 0.0018  | 0.0004  | 0.0011   | 0.0007 |
|                                              | <b>HbA<sub>1c</sub> state 4</b>  | 0.0114                  | 0.0538  | 0.2830  | 0.4167  | 0.1716  | 0.0446  | 0.0114  | 0.0029  | 0.0021   | 0.0025 |
|                                              | <b>HbA<sub>1c</sub> state 5</b>  | 0.0048                  | 0.0240  | 0.1055  | 0.2740  | 0.3329  | 0.1678  | 0.0568  | 0.0199  | 0.0055   | 0.0089 |
|                                              | <b>HbA<sub>1c</sub> state 6</b>  | 0.0045                  | 0.0116  | 0.0491  | 0.1438  | 0.2482  | 0.2768  | 0.1598  | 0.0661  | 0.0268   | 0.0134 |
|                                              | <b>HbA<sub>1c</sub> state 7</b>  | 0.0015                  | 0.0120  | 0.0316  | 0.0648  | 0.1687  | 0.2364  | 0.2184  | 0.1370  | 0.0768   | 0.0527 |
|                                              | <b>HbA<sub>1c</sub> state 8</b>  | 0.0043                  | 0.0065  | 0.0281  | 0.0562  | 0.0864  | 0.1533  | 0.1879  | 0.1965  | 0.1555   | 0.1253 |
|                                              | <b>HbA<sub>1c</sub> state 9</b>  | 0.0000                  | 0.0166  | 0.0194  | 0.0332  | 0.0831  | 0.1357  | 0.1662  | 0.1717  | 0.1828   | 0.1911 |
|                                              | <b>HbA<sub>1c</sub> state 10</b> | 0.0078                  | 0.0111  | 0.0277  | 0.0532  | 0.0831  | 0.0920  | 0.0854  | 0.0976  | 0.1042   | 0.4379 |

# SUPPLEMENTARY DATA

**Supplementary Table 2.** Glycosylated hemoglobin (HbA<sub>1c</sub>) used in the Markov model for men. HbA<sub>1c</sub> range definition at diagnosis, the mean natural HbA<sub>1c</sub> values for each HbA<sub>1c</sub> state at diagnosis (prior to initiating medication), the initial HbA<sub>1c</sub> distributions at diagnosis, and 3-month HbA<sub>1c</sub> transition probability matrices for men and women.

|                                              |                                  | <b>HbA<sub>1c</sub> State</b> |          |          |          |          |          |          |          |          |           |
|----------------------------------------------|----------------------------------|-------------------------------|----------|----------|----------|----------|----------|----------|----------|----------|-----------|
|                                              |                                  | <b>1</b>                      | <b>2</b> | <b>3</b> | <b>4</b> | <b>5</b> | <b>6</b> | <b>7</b> | <b>8</b> | <b>9</b> | <b>10</b> |
| <b>HbA<sub>1c</sub> Range</b>                |                                  | <6                            | [6,6.5)  | [6.5,7)  | [7,7.5)  | [7.5,8)  | [8,8.5)  | [8.5,9)  | [9,9.5)  | [9.5,10) | ≥10       |
| <b>Mean HbA<sub>1c</sub> value (%)</b>       |                                  | 5.69                          | 6.25     | 6.73     | 7.24     | 7.74     | 8.24     | 8.74     | 9.21     | 9.73     | 11.59     |
| <b>Initial HbA<sub>1c</sub> Distribution</b> |                                  | 0.0694                        | 0.1388   | 0.1968   | 0.1626   | 0.1138   | 0.0919   | 0.0619   | 0.0424   | 0.0328   | 0.0896    |
| <b>Transition Probability Matrix</b>         | <b>HbA<sub>1c</sub> state 1</b>  | 0.6244                        | 0.2885   | 0.0685   | 0.0093   | 0.0034   | 0.0025   | 0.0008   | 0.0008   | 0.0000   | 0.0017    |
|                                              | <b>HbA<sub>1c</sub> state 2</b>  | 0.1574                        | 0.4949   | 0.2953   | 0.0402   | 0.0072   | 0.0038   | 0.0004   | 0.0000   | 0.0004   | 0.0004    |
|                                              | <b>HbA<sub>1c</sub> state 3</b>  | 0.0349                        | 0.2061   | 0.4715   | 0.2279   | 0.0441   | 0.0078   | 0.0024   | 0.0012   | 0.0024   | 0.0018    |
|                                              | <b>HbA<sub>1c</sub> state 4</b>  | 0.0130                        | 0.0592   | 0.2462   | 0.4014   | 0.1971   | 0.0549   | 0.0166   | 0.0043   | 0.0029   | 0.0043    |
|                                              | <b>HbA<sub>1c</sub> state 5</b>  | 0.0098                        | 0.0237   | 0.1058   | 0.2606   | 0.3029   | 0.1852   | 0.0686   | 0.0243   | 0.0083   | 0.0108    |
|                                              | <b>HbA<sub>1c</sub> state 6</b>  | 0.0058                        | 0.0134   | 0.0645   | 0.1335   | 0.2313   | 0.2888   | 0.1514   | 0.0550   | 0.0294   | 0.0268    |
|                                              | <b>HbA<sub>1c</sub> state 7</b>  | 0.0104                        | 0.0142   | 0.0455   | 0.0796   | 0.1308   | 0.2284   | 0.2351   | 0.1422   | 0.0645   | 0.0493    |
|                                              | <b>HbA<sub>1c</sub> state 8</b>  | 0.0111                        | 0.0249   | 0.0456   | 0.0526   | 0.0982   | 0.1674   | 0.1840   | 0.1646   | 0.1328   | 0.1189    |
|                                              | <b>HbA<sub>1c</sub> state 9</b>  | 0.0125                        | 0.0233   | 0.0412   | 0.0376   | 0.0789   | 0.1057   | 0.1595   | 0.1792   | 0.1344   | 0.2276    |
|                                              | <b>HbA<sub>1c</sub> state 10</b> | 0.0098                        | 0.0249   | 0.0537   | 0.0688   | 0.0629   | 0.0799   | 0.0911   | 0.0996   | 0.1134   | 0.3958    |

## SUPPLEMENTARY DATA

### Reference

1. Bennett WL, Wilson LM, Bolen S, et al. Oral Diabetes Medications for Adults With Type 2 Diabetes: An Update. In: Comparative Effectiveness Reviews. No. 27. Rockville, MD: Agency for Healthcare Research and Quality (US); 2011
